# Supplementary material
Source: publisher site journal article supplement (https://www.dovepress.com/article/386463)
Supplement: Supplementary file 1 [file get_supplementary_file.php]

**Supplemental Table 1. Comorbidity ICD-10 Codes**

| Conditions | ICD-10 Codes |
| --- | --- |
| Diabetes | E11.0-E11.9 |
| Coronary Artery Disease | I25.1-I25.9 |
| Heart Failure | I50.0, I50.1, I50.9 |
| Chronic Kidney Disease | N18.1-N18.5, N18.9 |
| Liver Disease | K70-K77 |
| Chronic Pulmonary Condition | J40-J47 |
| Cerebrovascular Disease | I60.3-I60.7 |
| Peripheral Vascular Disease | I70.0-I70.2, I70.8-I70.9 |
| COPD | J44.9 |

**Supplemental Table 2: Distribution of NIH Severity Scores by COPD Status**

| NIH Severity Score | Definition | COPD | Non-COPD | Total: |
| --- | --- | --- | --- | --- |
| N (% of COPD) | N (% of Non-COPD) |
| 4 | Not requiring supplemental oxygen but requiring ongoing medical care | 4 (3.28%) | 193 (13.64%) | 197 |
| 5 | Requiring any supplemental oxygen | 5 (4.10%) | 30 (2.12%) | 35 |
| 6 | Requiring noninvasive ventilation or use of high-flow oxygen devices | 78 (63.93%) | 889 (62.83%) | 966 |
| 7 | Receiving invasive mechanical ventilation or extracorporeal membrane oxygenation | 12 (9.84%) | 135 (9.54%) | 147 |
| 8 | Death | 23 (18.85%) | 168 (11.87%) | 191 |
|  | Total: | 122 (100%) | 1415 (100%) |  |
|  | *Trend test: | *P*<0.001 |  |  |
| *Mann-Whitney U test | | | | |

**Supplemental Table 3: Frequency of Censored Observations in Fine-Gray Analysis for Primary Outcomes Analysis**

|  | Censored Patients | |
| --- | --- | --- |
|  | COPD | Non-COPD |
|  | N (%) | N (%) |
| In-hospital Mortality | 36 (29.51%) | 302 (17.67%) |
| ICU Admission | 26 (21.31%) | 184 (10.77%) |
| Mechanical Ventilation | 29 (23.77%) | 221 (12.93%) |

**Supplemental Table 4. Unadjusted Effects of COPD Treatment on Outcomes in Patients with COPD**

|  | Yes (N) | No (N) | In-Hospital Death | | | ICU Admission | | | | Mechanical Ventilation | | | |
| --- | --- | --- | --- | --- | --- | --- | --- | --- | --- | --- | --- | --- | --- |
|  | *HR (95% CI) | | *P* | *HR (95% CI) | | | *P* | *HR (95% CI) | | *P* | |
| aDemographics |  |  |  | |  |  | | |  |  | |  | |
| Managed by pulmonologist | 60 | 60 | 1.14 (0.51, 2.59) | | 0.747 | 1.02 (0.59, 1.80) | | | 0.944 | 0.71 (0.30, 1.67) | | 0.433 | |
| History of COPD exacerbation | 33 | 79 | 0.68 (0.22, 2.05) | | 0.490 | 0.64 (0.32, 1.30) | | | 0.217 | 0.42 (0.12, 1.40) | | 0.157 | |
| aMedications |  |  |  | |  |  | | |  |  | |  | |
| Aspirin | 60 | 62 | 1.03 (0.46, 2.27) | | 0.952 | 0.70 (0.39, 1.25) | | | 0.225 | 0.30 (0.11, 0.81) | | 0.017 | |
| Beta blocker | 54 | 68 | 1.46 (0.66, 3.25) | | 0.351 | 1.24 (0.71, 2.19) | | | 0.455 | 0.95 (0.41, 2.21) | | 0.897 | |
| Long-acting beta agonist | 51 | 71 | 0.55 (0.24, 1.30) | | 0.174 | 0.63 (0.34, 1.16) | | | 0.140 | 0.40 (0.15, 1.09) | | 0.074 | |
| Long-acting muscarinic antagonist | 44 | 77 | 0.43 (0.15, 1.25) | | 0.121 | 0.59 (0.30, 1.14) | | | 0.113 | 0.20 (0.05, 0.86) | | 0.030 | |
| Inhaled Corticosteroid | 53 | 69 | 0.80 (0.36, 1.80) | | 0.594 | 0.65 (0.36, 1.17) | | | 0.152 | 0.51 (0.20, 1.28) | | 0.150 | |
|  | Yes (N) | No (N) | NIH Severity Score, OR (95% CI) | | | | | Hospital Duration (days), mean (SD) | | | | |
|  | Yes | No | | | *P* | Yes | | No | *P* | |
| bDemographics |  |  |  |  | | |  |  | |  |  | |
| Managed by pulmonologist | 60 | 60 | 6.43 (0.85) | 6.28 (1.03) | | | 0.605 | 13.6 (11.0) | | 12.7 (13.9) | 0.115 | |
| History of COPD exacerbation | 33 | 79 | 6.21 (0.82) | 6.35 (0.96) | | | 0.390 | 14.0 (12.3) | | 13.0 (12.9) | 0.462 | |
| bMedications |  |  |  |  | | |  |  | |  |  | |
| Aspirin | 60 | 62 | 6.30 (0.94) | 6.44 (0.95) | | | 0.297 | 11.3 (9.7) | | 14.8 (14.4) | 0.269 | |
| Beta blocker | 54 | 68 | 6.43 (0.98) | 6.32 (0.92) | | | 0.569 | 13.6 (13.7) | | 12.7 (11.4) | 0.759 | |
| Long-acting beta agonist | 51 | 71 | 6.22 (0.83) | 6.48 (1.01) | | | 0.063 | 14.0 (14.4) | | 12.4 (10.8) | 0.681 | |
| Long-acting muscarinic antagonist | 44 | 77 | 6.14 (0.73) | 6.48 (1.02) | | | 0.031 | 11.2 (9.9) | | 14.0 (13.5) | 0.432 | |
| Inhaled Corticosteroid | 53 | 69 | 6.30 (0.90) | 6.40 (1.00) | | | 0.328 | 13.3 (13.9) | | 12.9 (11.2) | 0.957 | |
| aFine and Gray Competing Risk Model; bWilcoxon Rank Sum Test; Logistical Model | | | | | | | | | | |  | |
| HR = Hazard Ratio; CI = Confidence Interval  *Hazard ratios compared to null treatment/intervention. | | | | | | | | | | |  | |

**Supplemental Table 5. Pulmonary function test values and their outcomes among COPD group**

|  | ICU Admission | | | Mechanical Ventilation | | | In-Hospital Death | | |
| --- | --- | --- | --- | --- | --- | --- | --- | --- | --- |
|  | No | Yes | *P* | No | Yes | *P* | No | Yes | *P* |
| aSpirometry values |  |  |  |  |  |  |  |  |  |
| n | 28 | 15 |  | 33 | 10 |  | 35 | 8 |  |
| FEV1 (% of predicted), mean (SD) | 73.8 (29.1) | 81.6 (25.0) | 0.558 | 76.3 (28.7) | 77.3 (25.5) | 0.897 | 75.4 (27.9) | 81.3 (28.0) | 0.685 |
| n | 28 | 15 |  | 33 | 10 |  | 35 | 8 |  |
| FEV1/FVC ratio, mean (SD) | 62.7 (16.7) | 65.0 (11.3) | 0.216 | 65.2 (15.6) | 64.9 (14.6) | 0.874 | 64.4 (15.2) | 68.2 (16.2) | 0.444 |
| n | 23 | 11 |  | 28 | 6 |  | 29 | 5 |  |
| DLCO (% of predicted), mean (SD) | 61.3 (19.5) | 52.6 (18.1) | 0.320 | 59.6 (19.8) | 53.3 (16.5) | 0.572 | 58.1 (18.6) | 60.8 (25.0) | 0.752 |
|  |  | NIH Severity Score | | Hospital Duration | |  |  |  |  |
|  |  | ρ | *P* | ρ | *P* |  |  |  |  |
| bSpirometry values |  |  |  |  |  |  |  |  |  |
| FEV1 (% of predicted) | 43 | 0.036 | 0.820 | 0.084 | 0.593 |  |  |  |  |
| FEV1/FVC ratio | 43 | 0.172 | 0.269 | 0.025 | 0.873 |  |  |  |  |
| DLCO (% of predicted) | 35 | -0.030 | 0.868 | -0.331 | 0.056 |  |  |  |  |
| aWilcoxon Rank Sum Test; bSpearman Correlations Analysis | | | | | | |  |  |  |
| SD = standard deviation; ρ = Spearman's rank correlation coefficient | | | | | | |  |  |  |
